# Supplementary material for: UBQLN Family Members Regulate MYC in Lung Adenocarcinoma Cells
Source: MDPI journal article supplement (doi:10.3390/cancers15133389), 2023-06-28

Figure S1

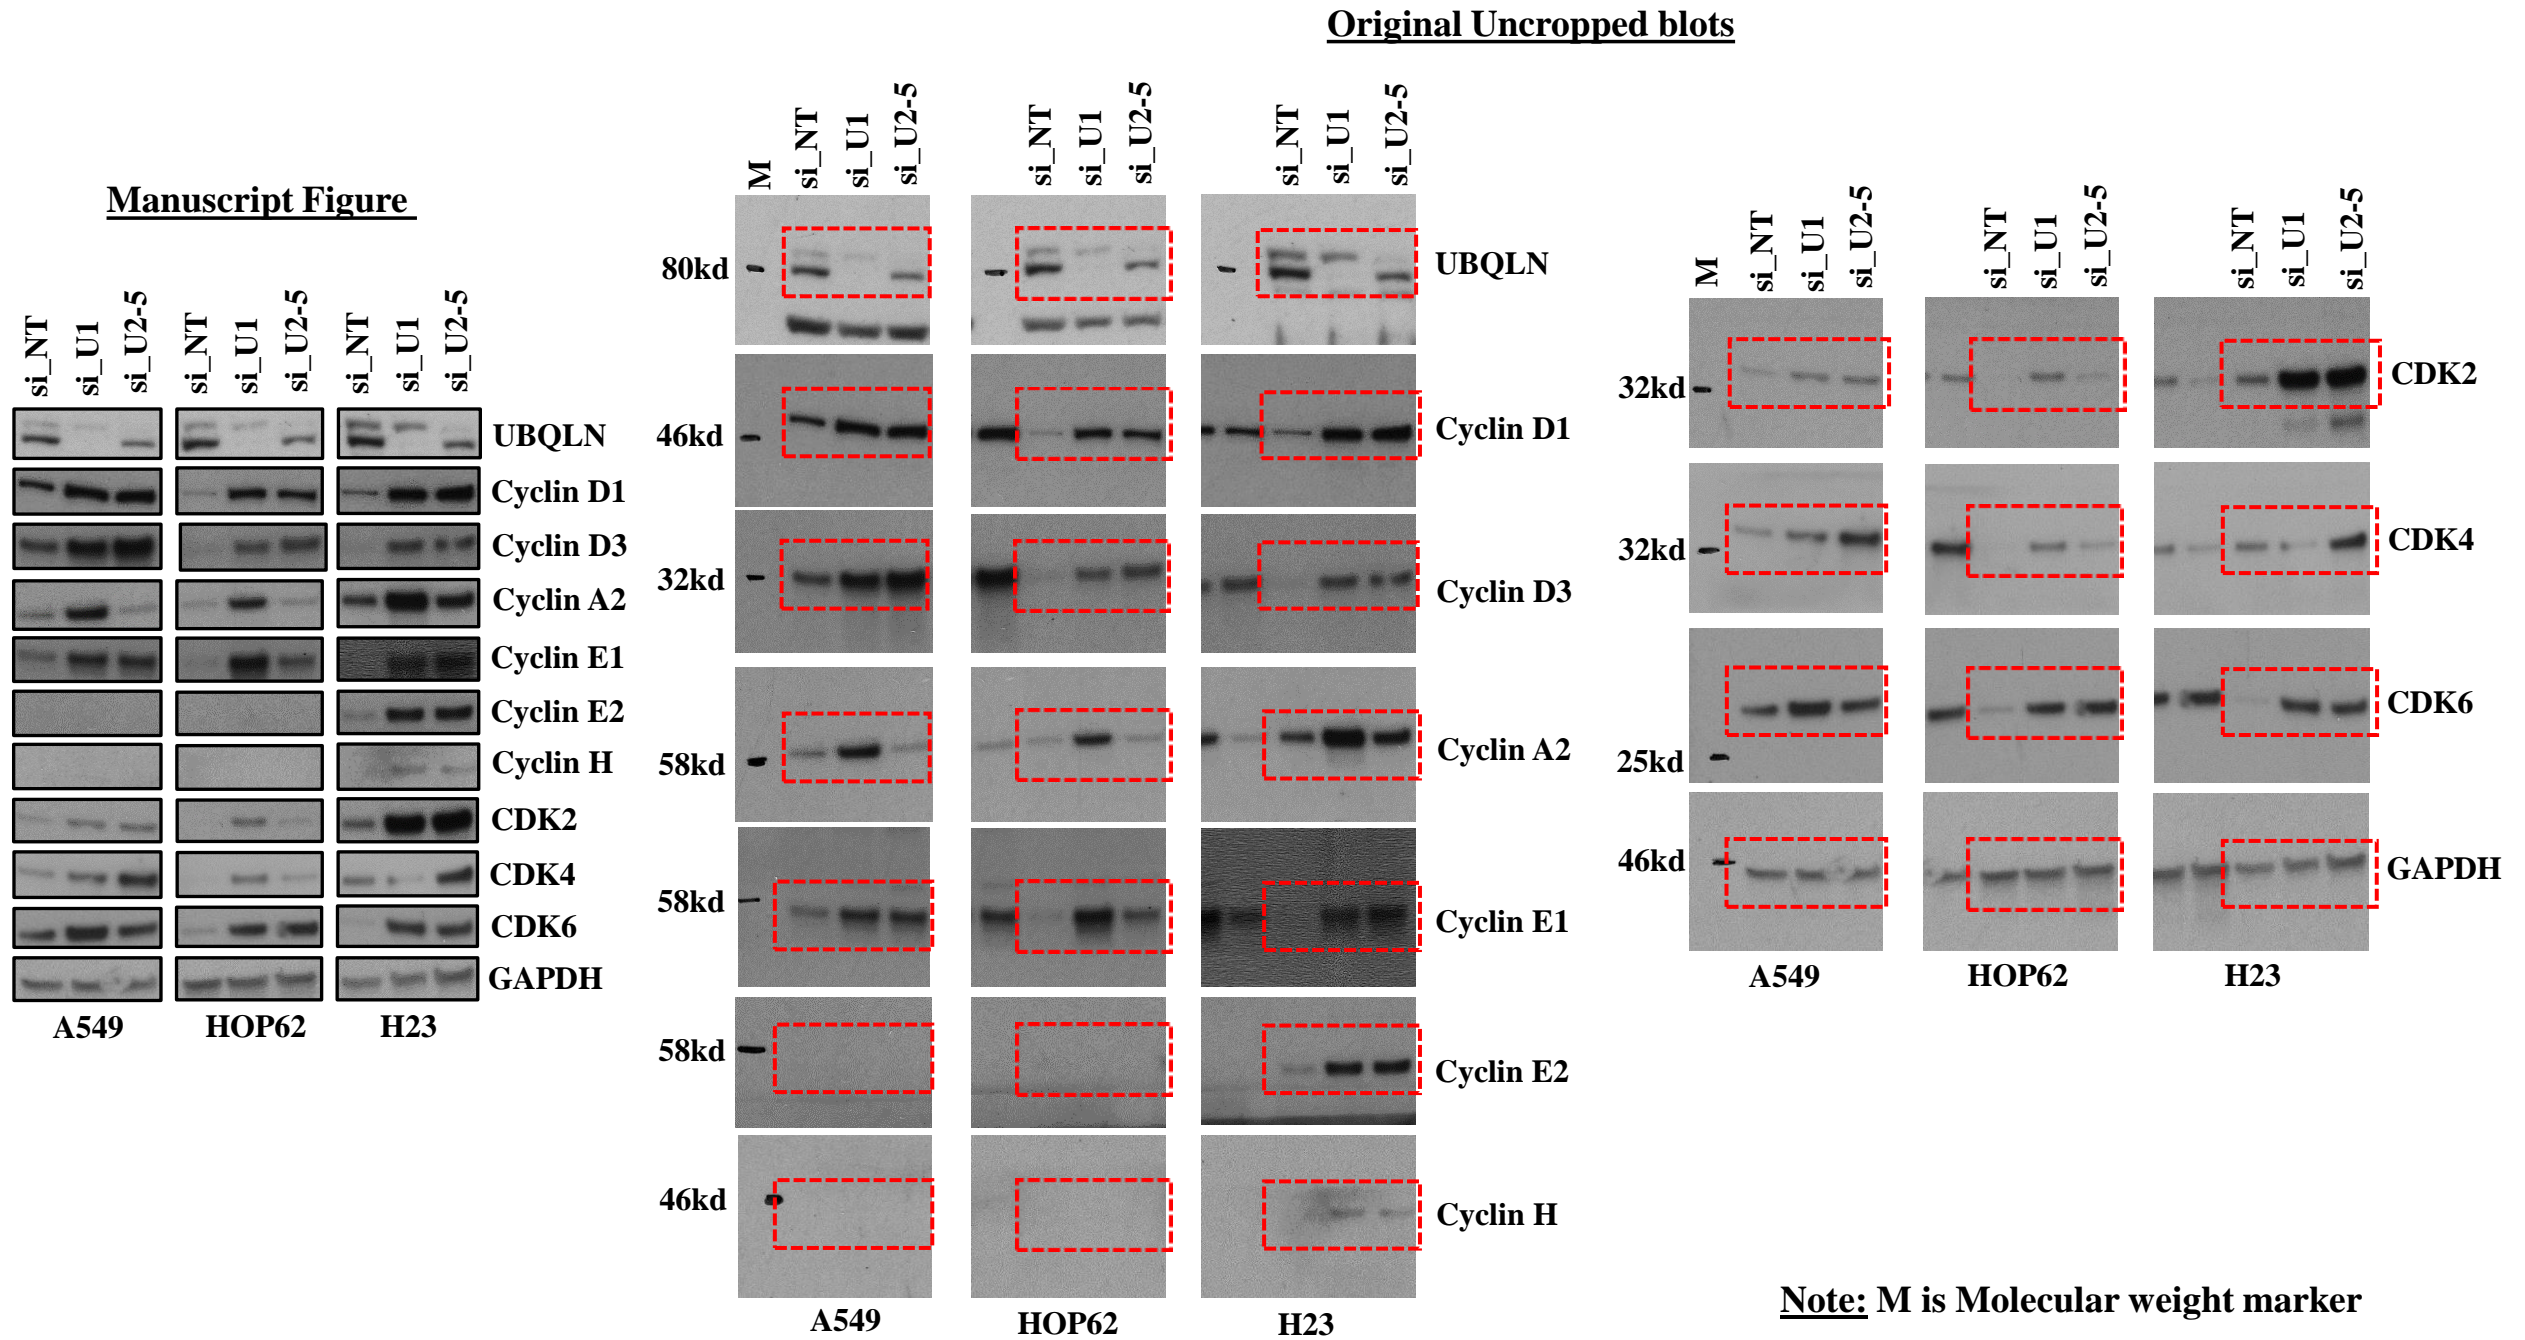

Figure S2

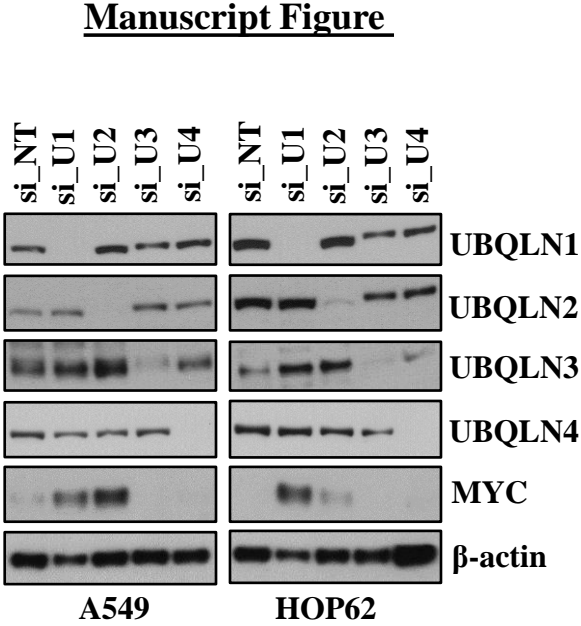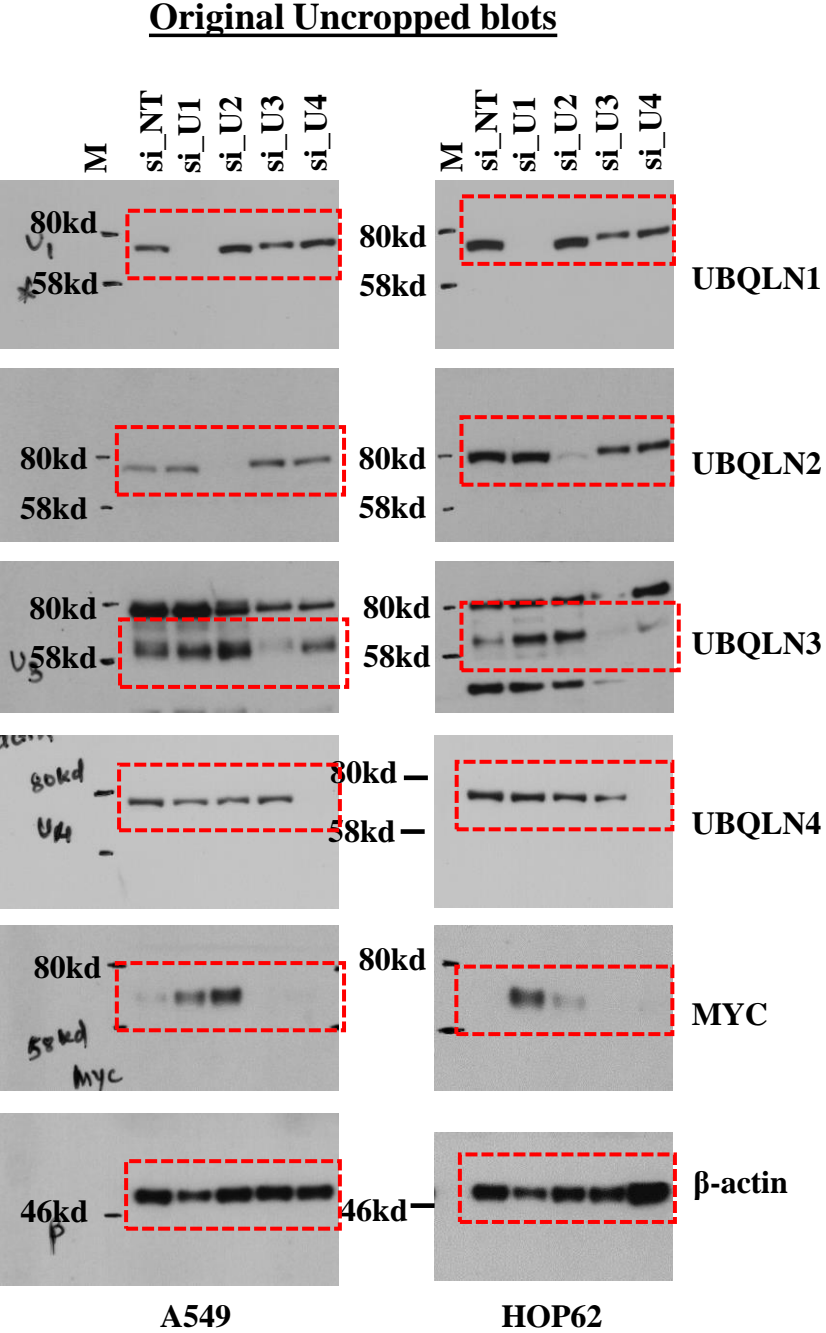

**Note:** M is Molecular weight marker

Figure S3A

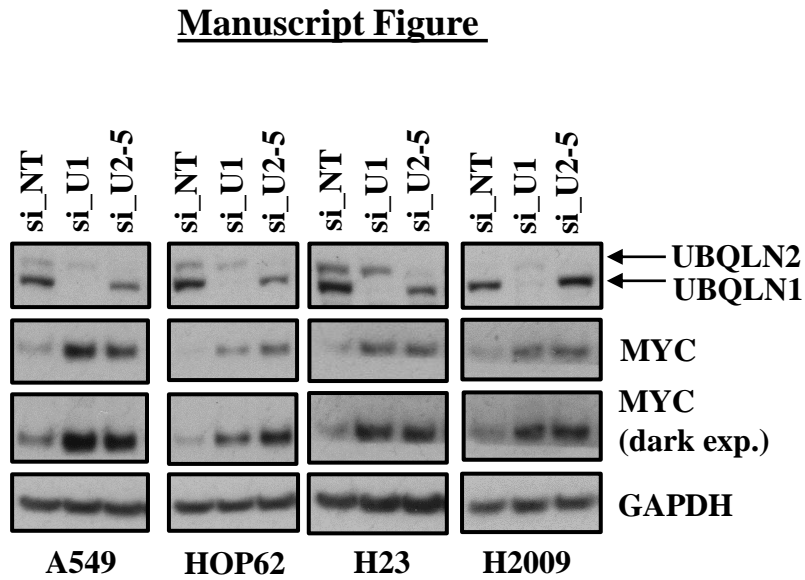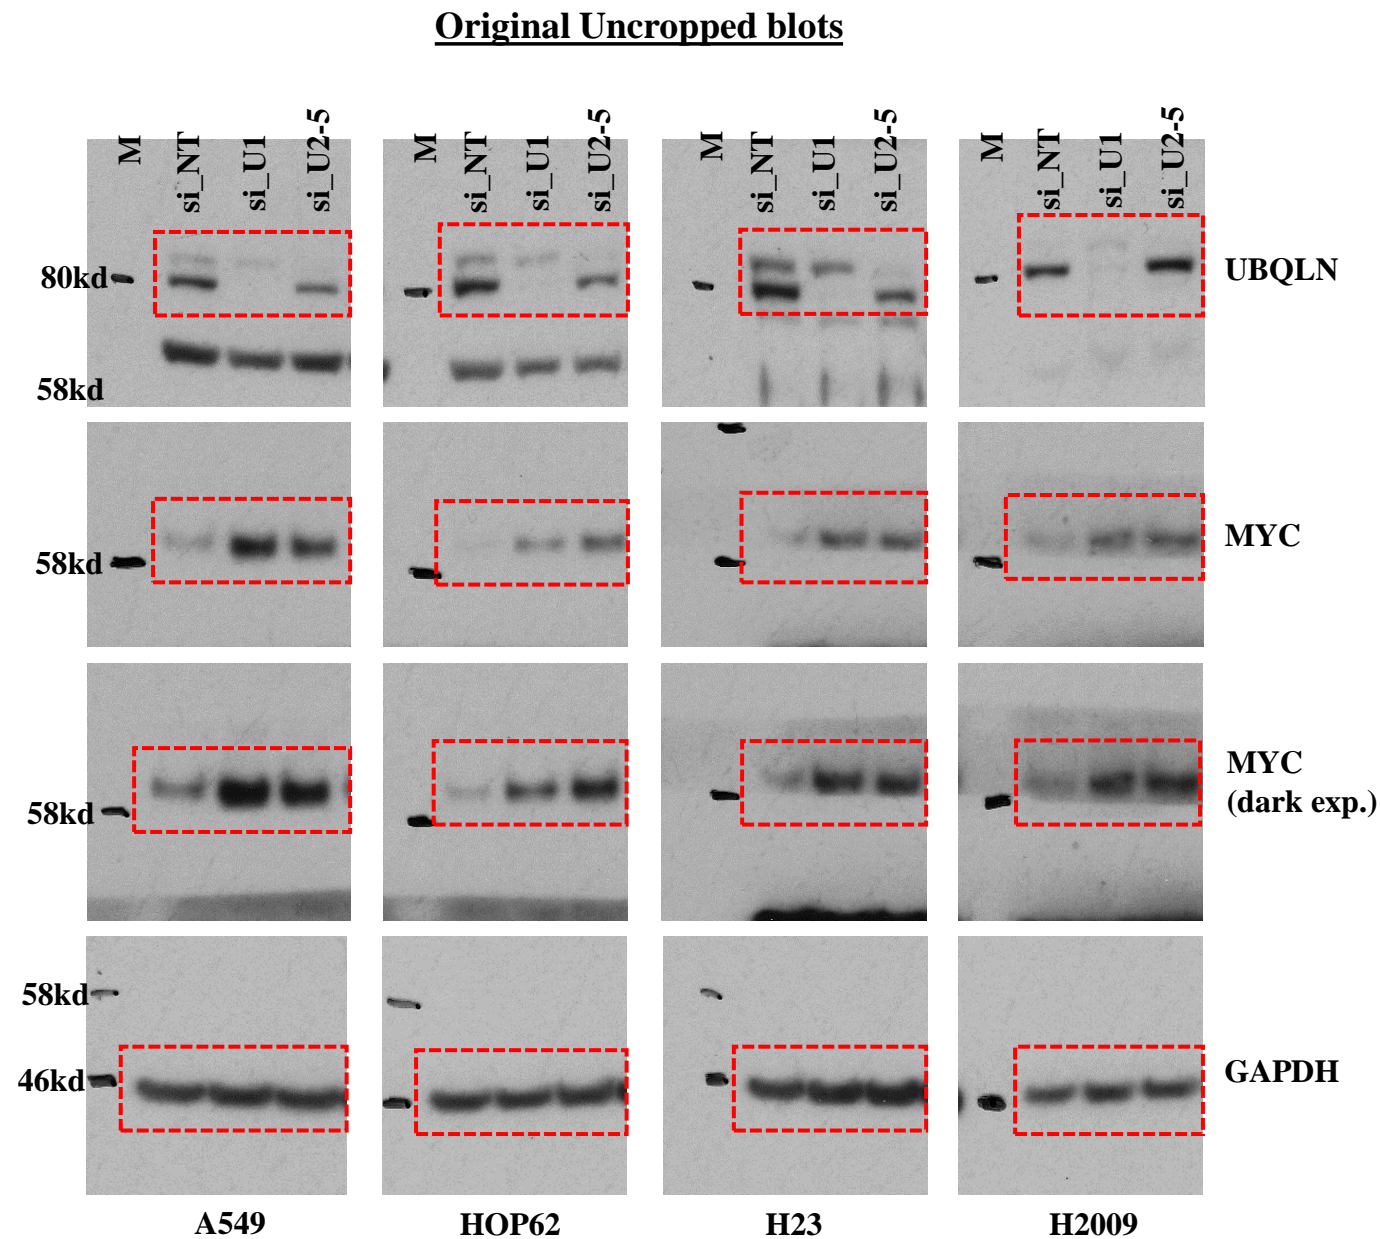

**Note:** M is Molecular weight marker



Figure S3B

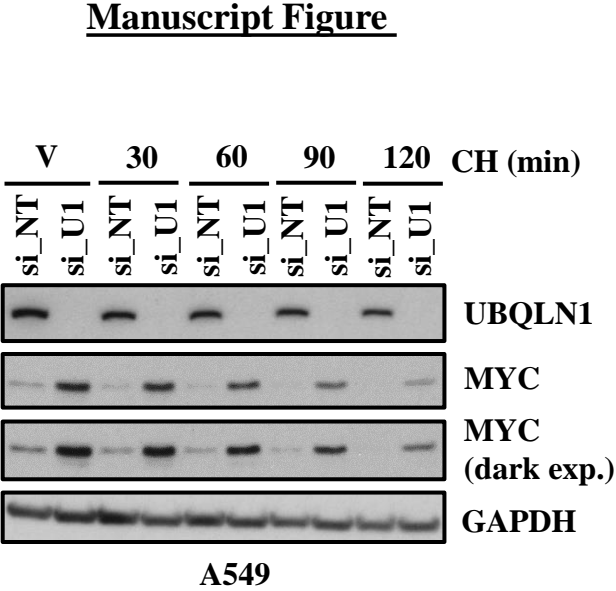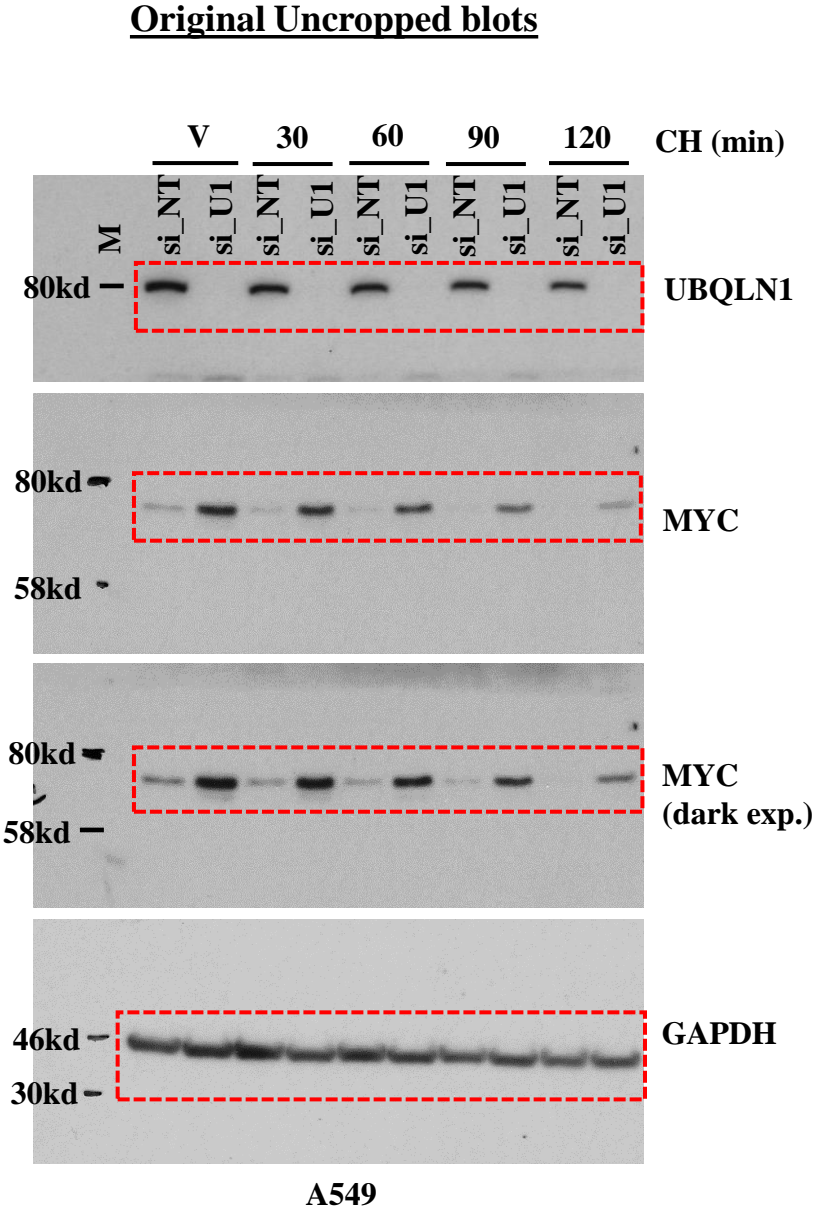

Note: M is Molecular weight marker

Figure S3C

Manuscript Figure

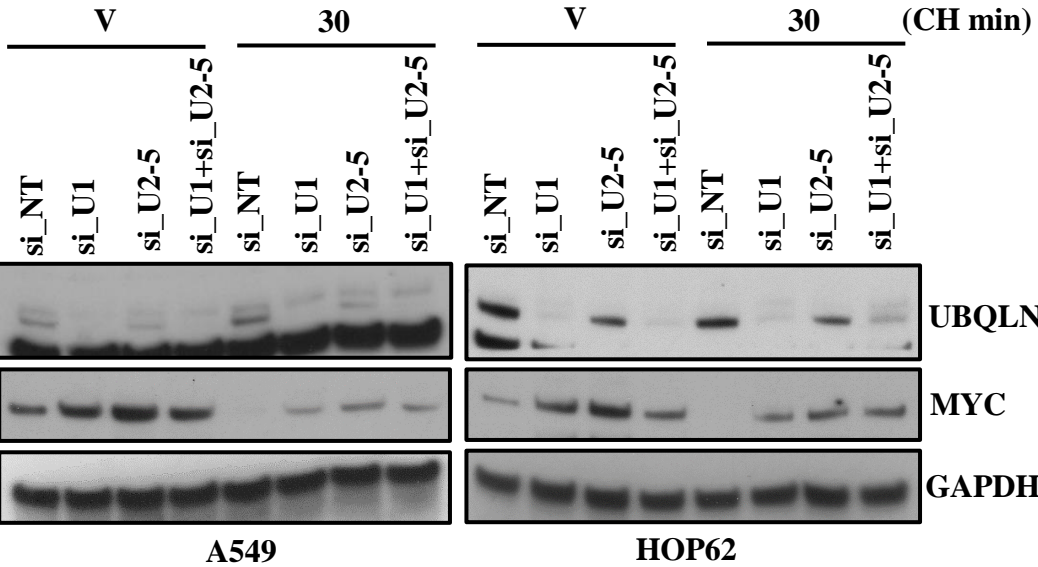

Original Uncropped blots

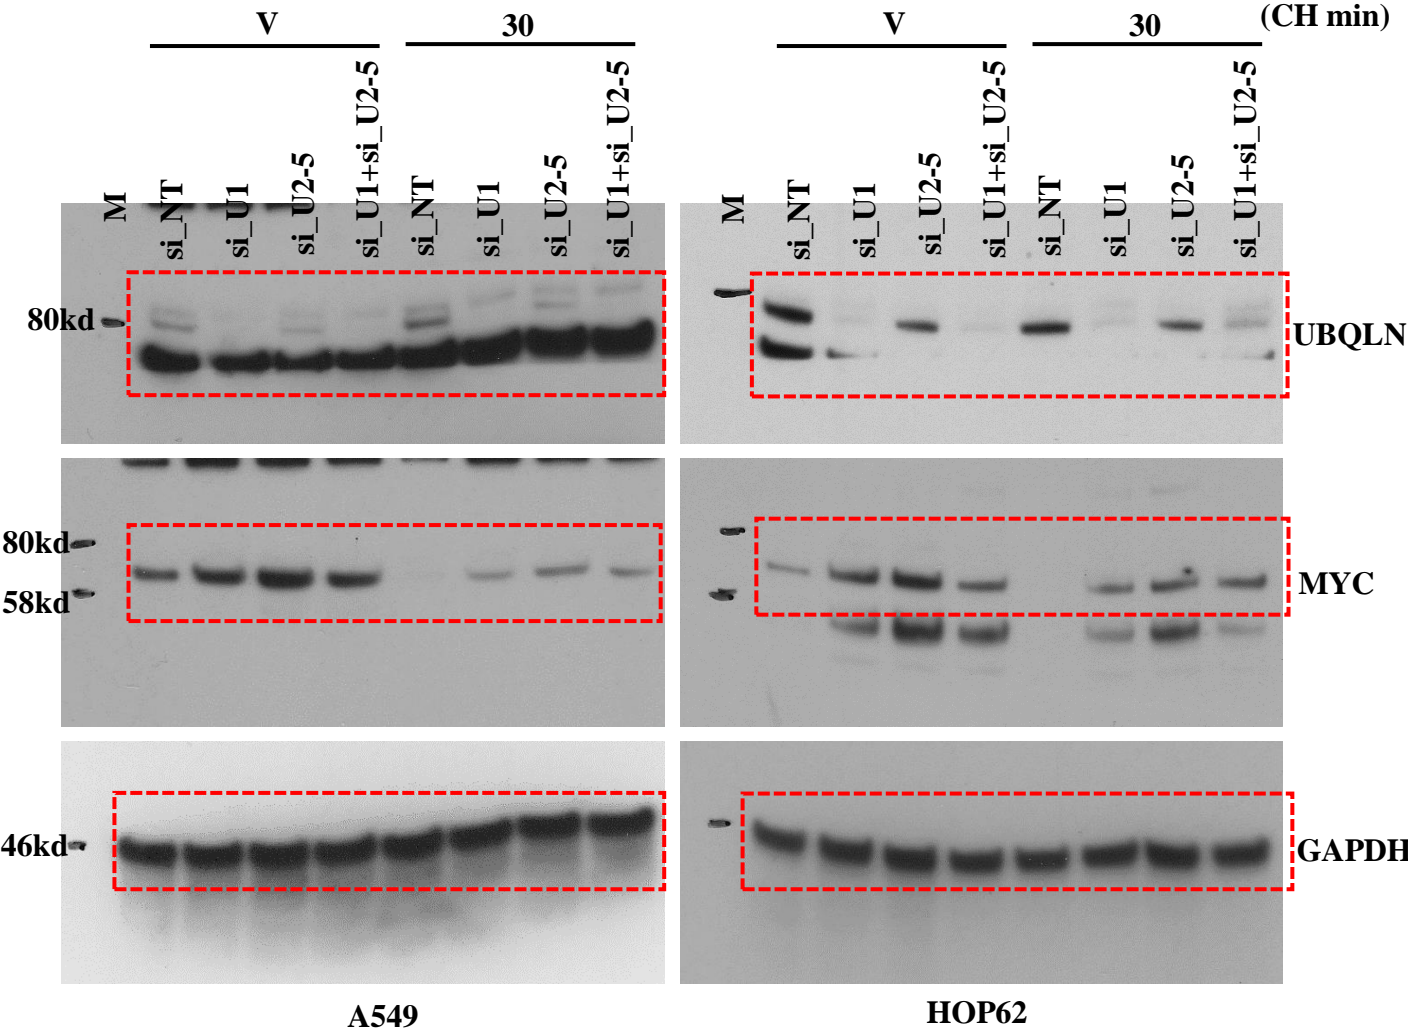

Note: M is Molecular weight marker

Figure S3D

Original Uncropped blots

Manuscript Figure

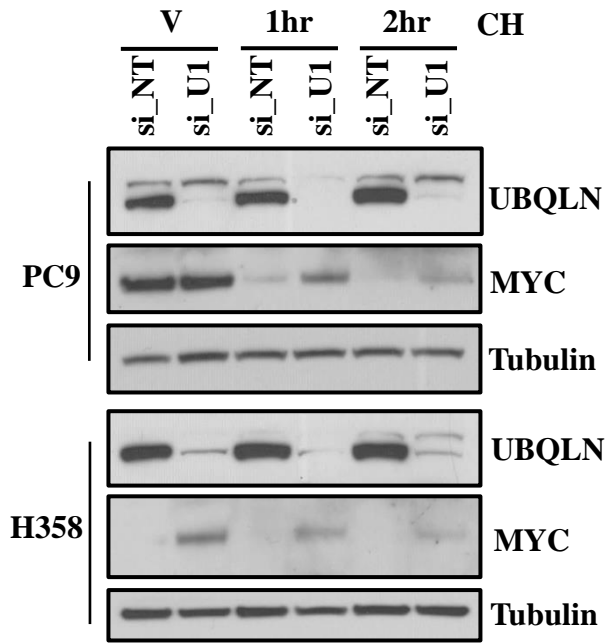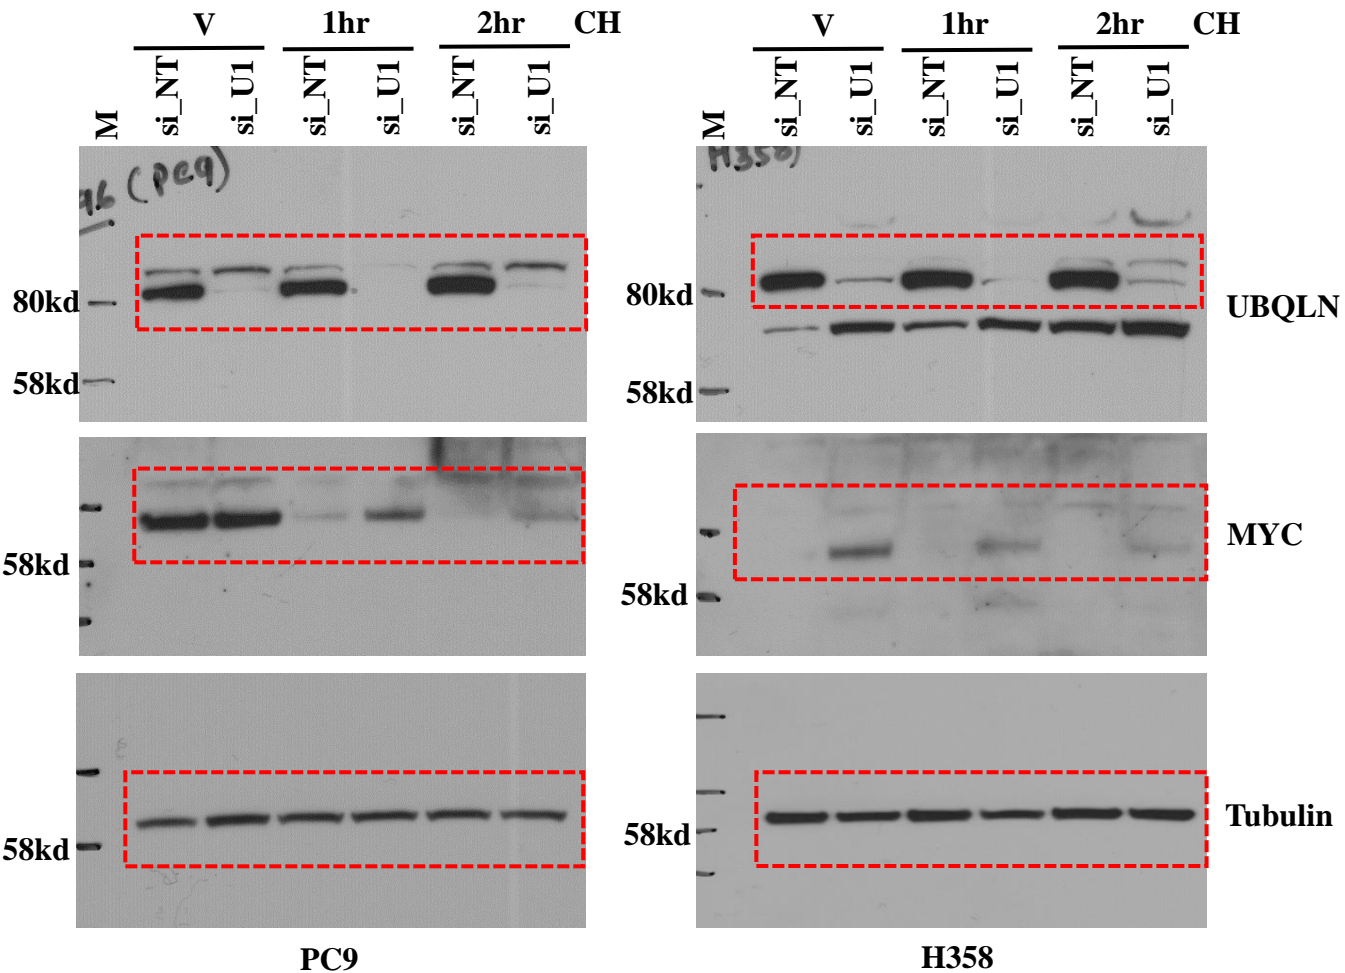

Note: M is Molecular weight marker

Figure S4A

Manuscript Figure

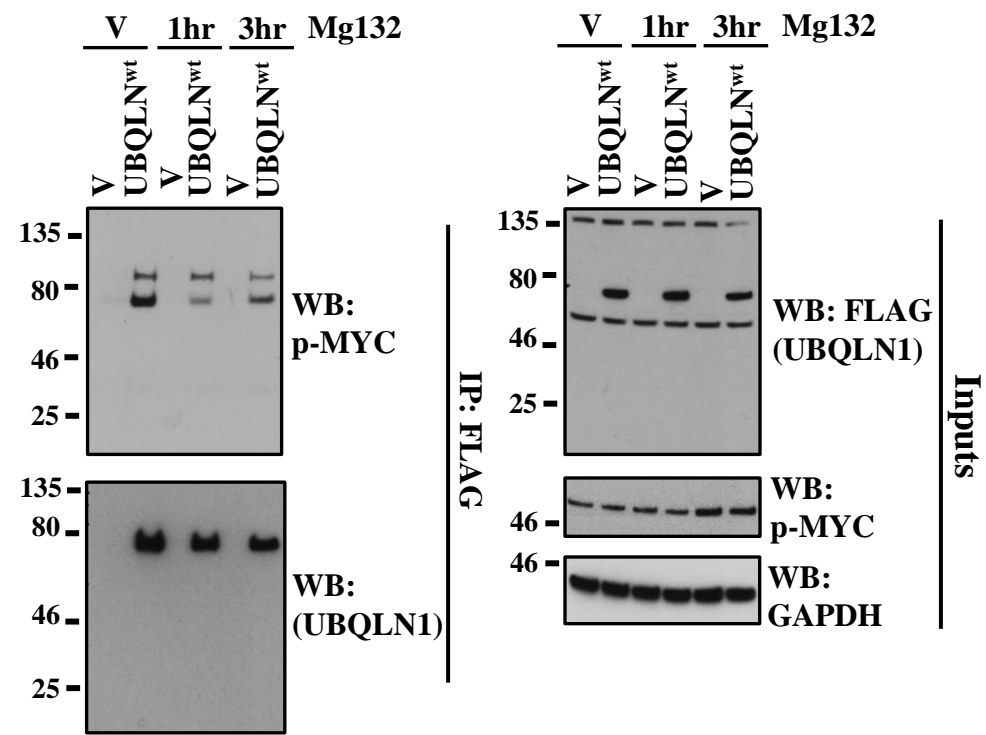

Original Uncropped blots

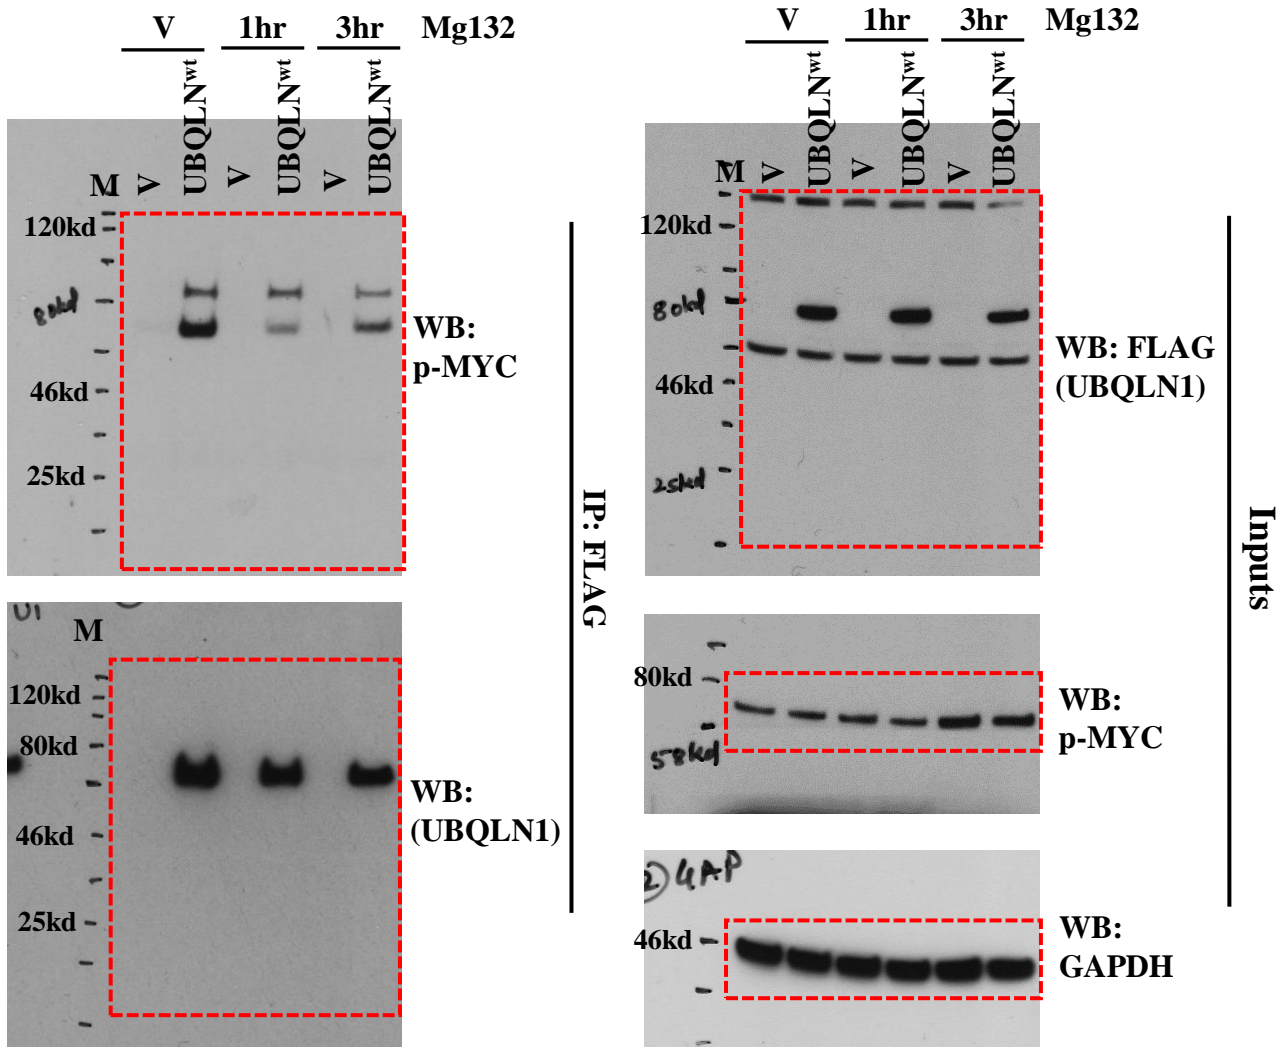

Note: M is Molecular weight marker



Figure S4B

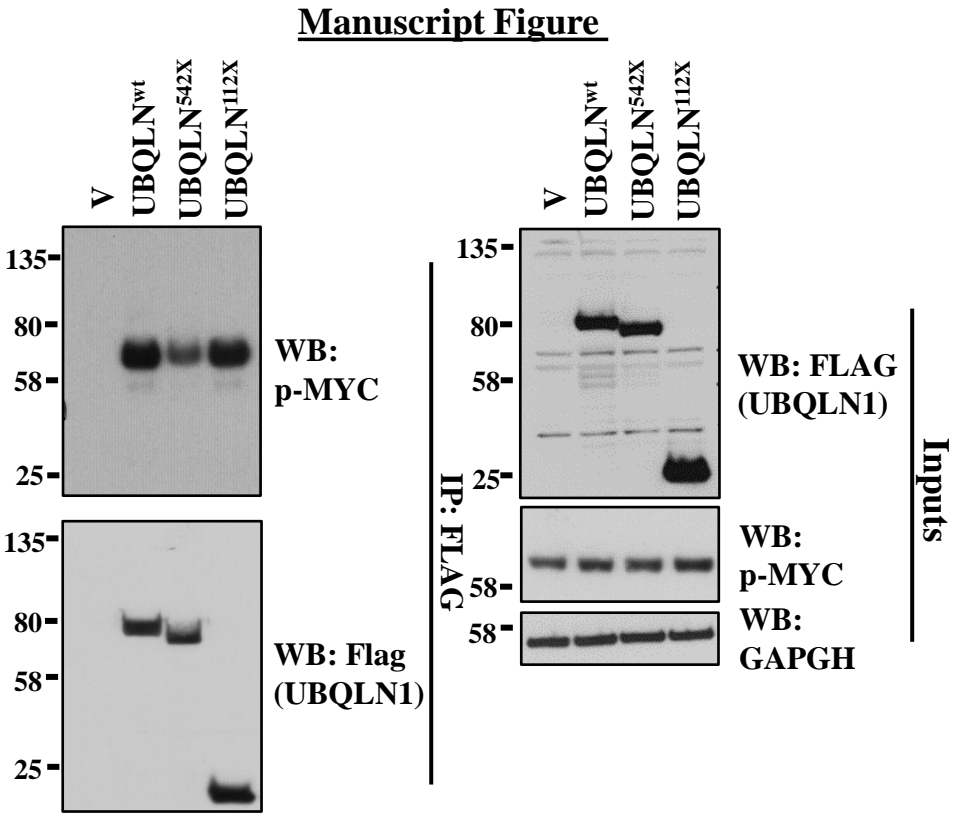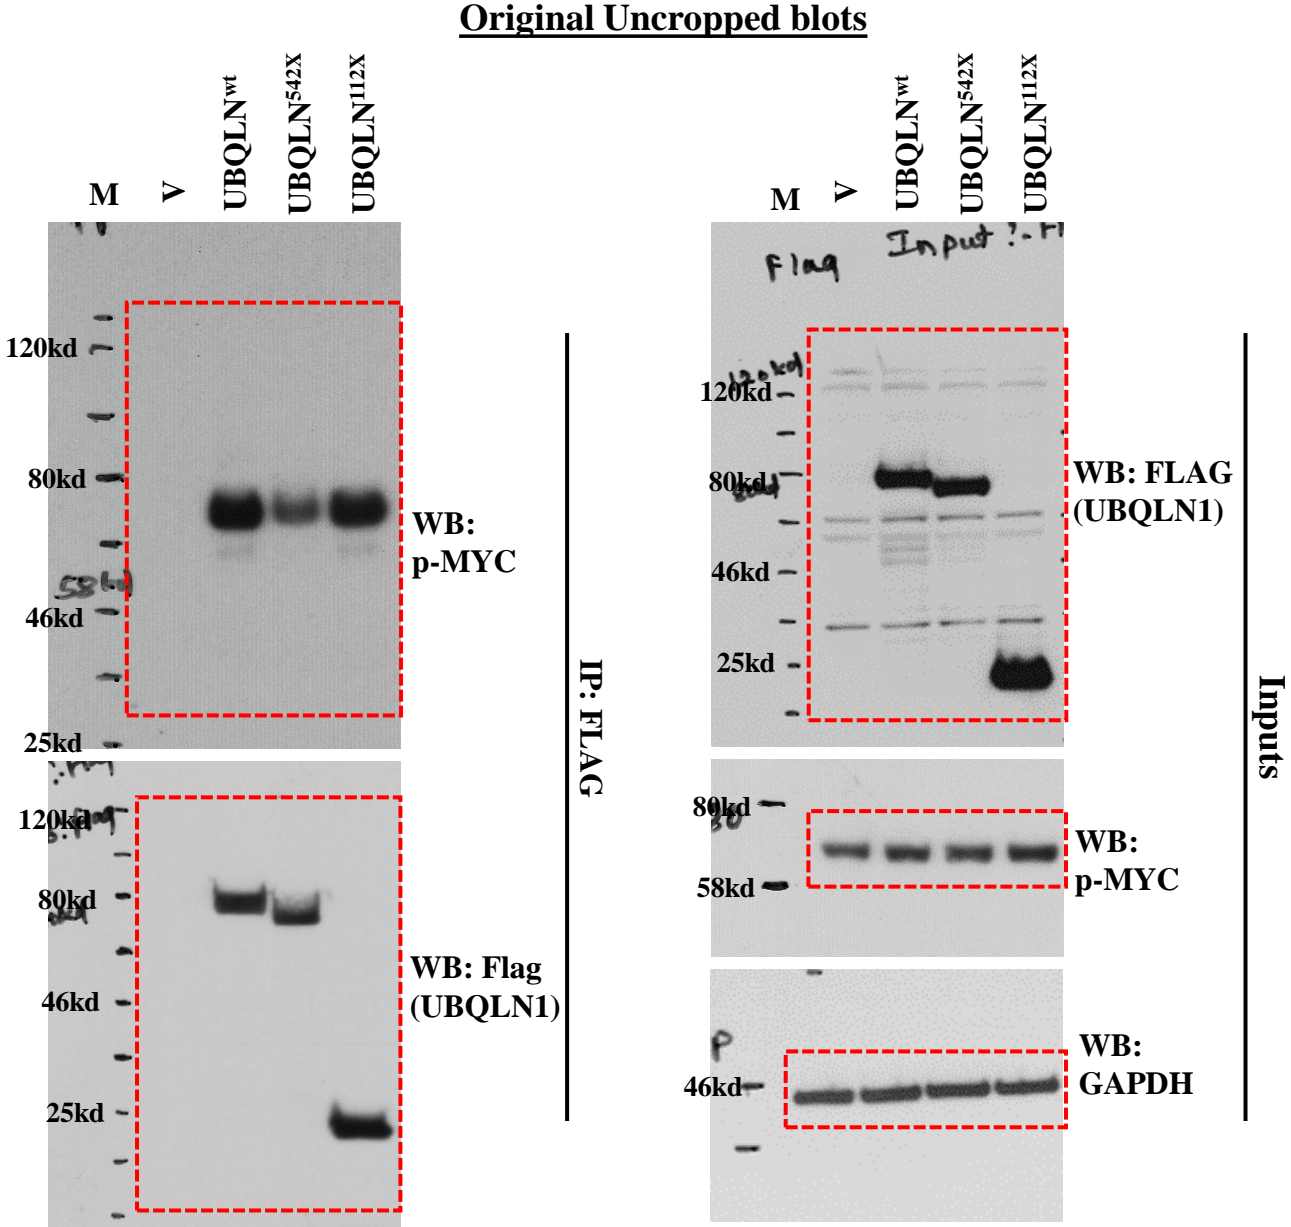

Note: M is Molecular weight marker



Figure S4C

Manuscript Figure

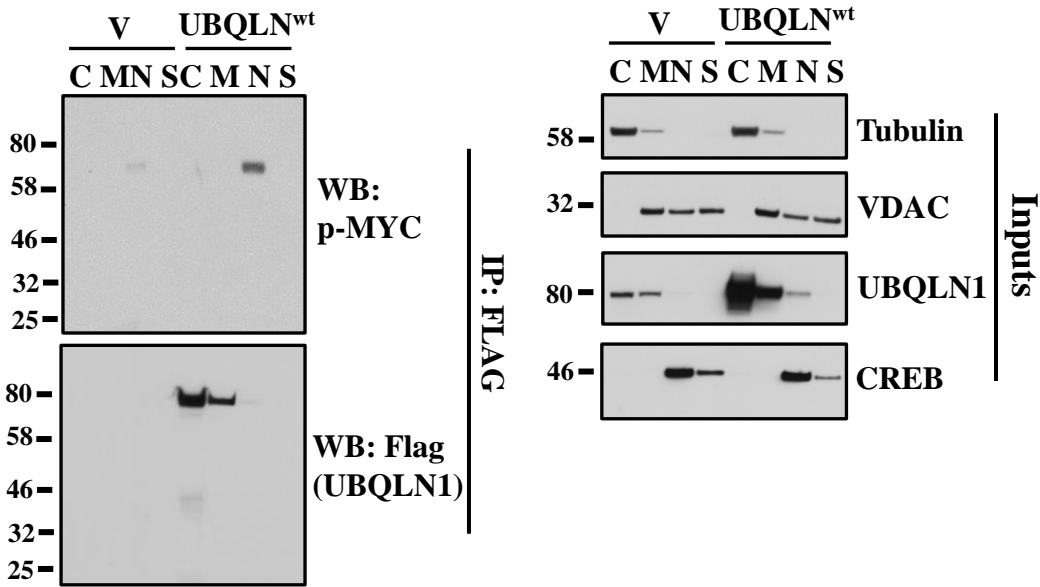

Original Uncropped blots

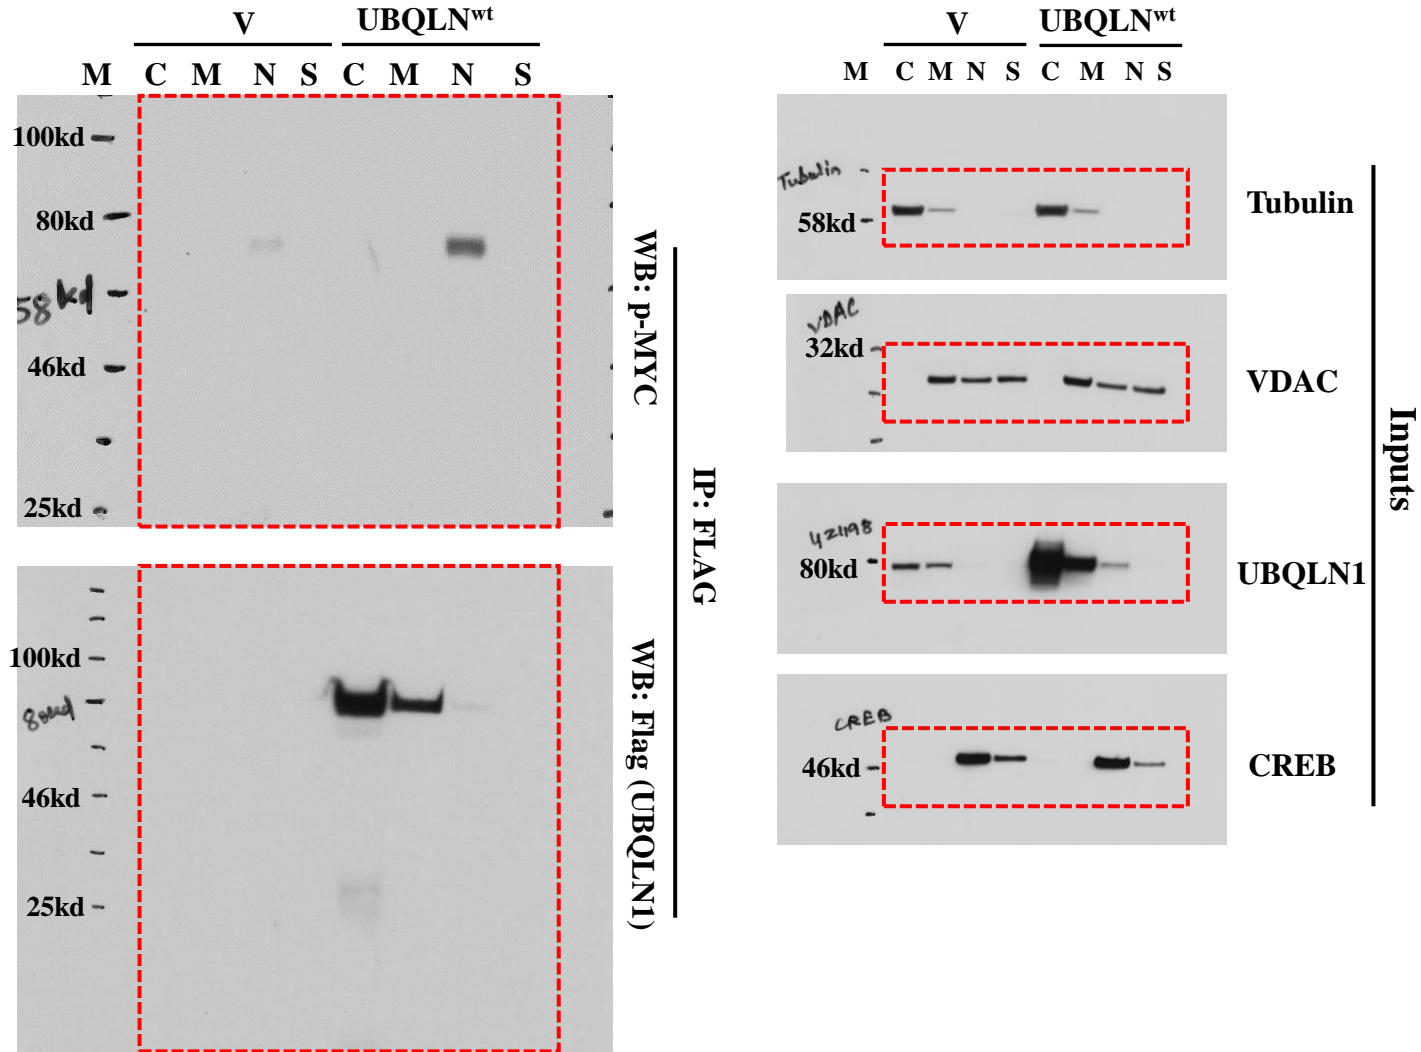

Note: M is Molecular weight marker

Figure S4D

Manuscript Figure

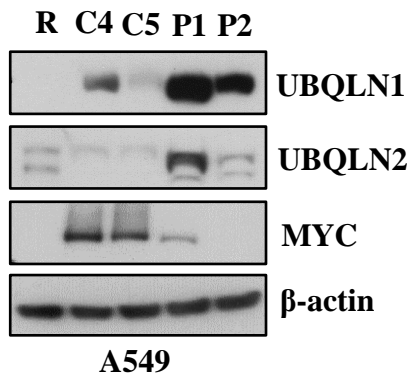

Original Uncropped blots

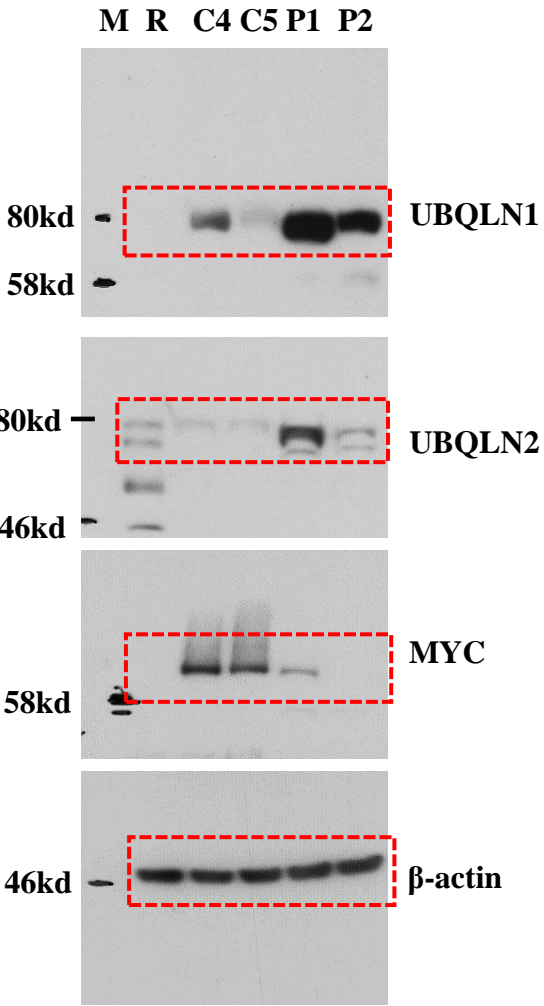

Note: M is Molecular weight marker

Figure S4E

Manuscript Figure

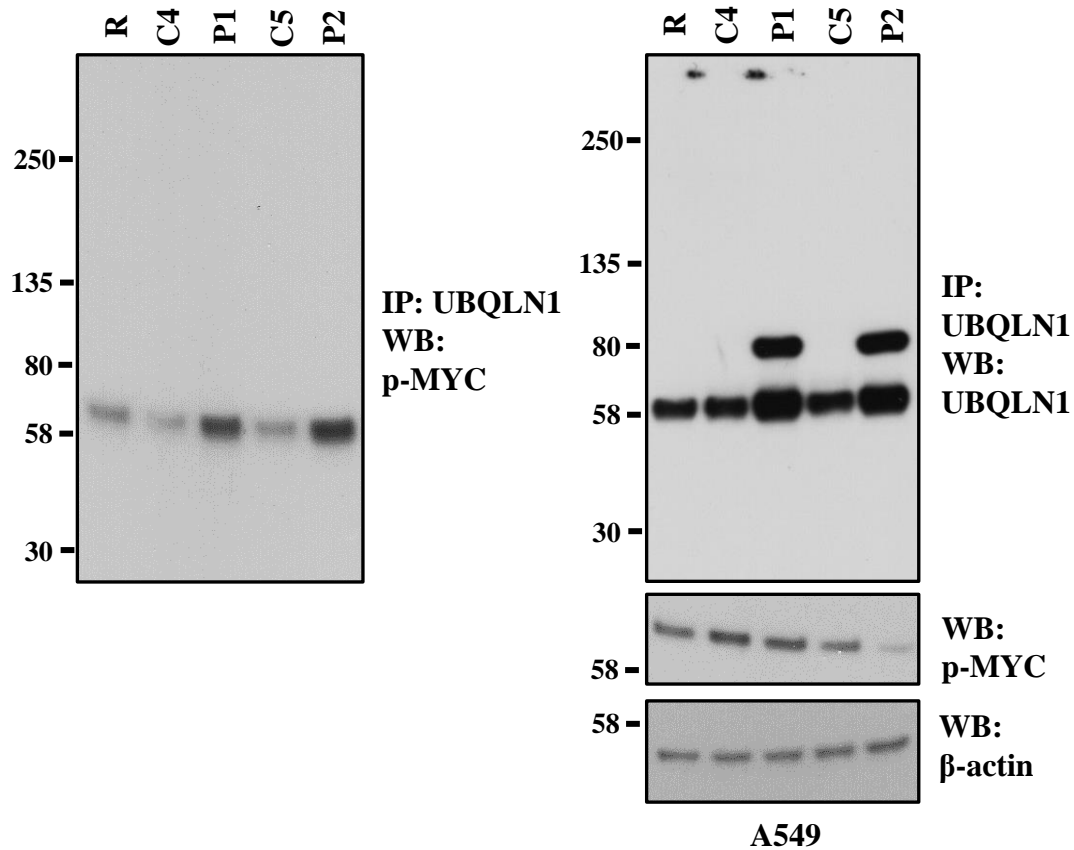

Original Uncropped blots

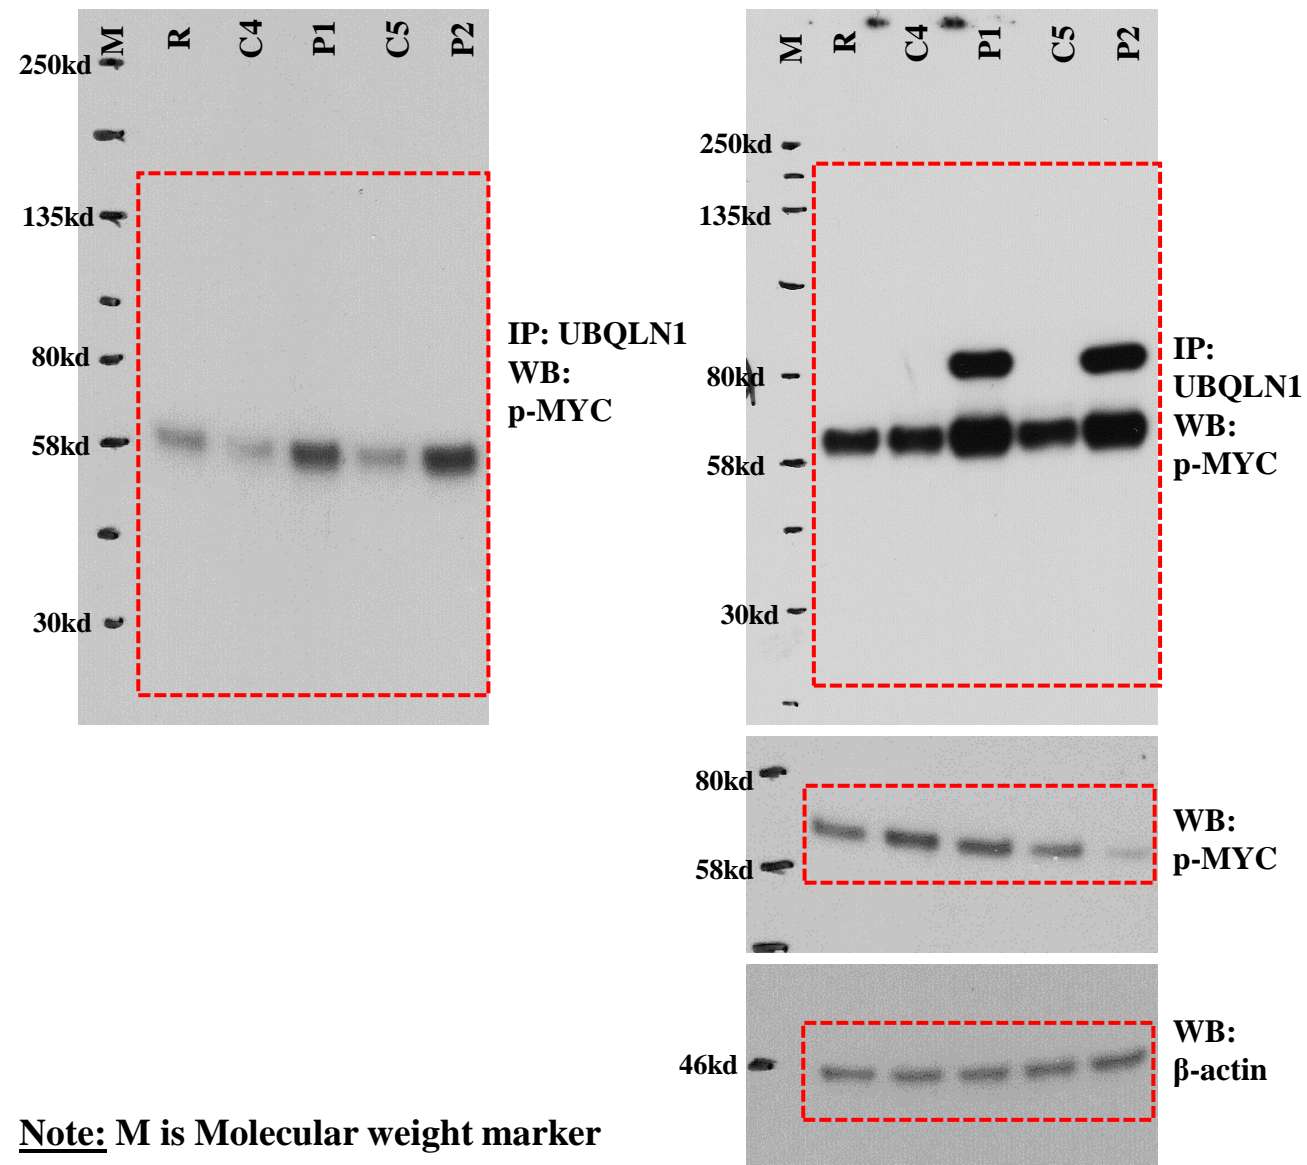



Figure S4F

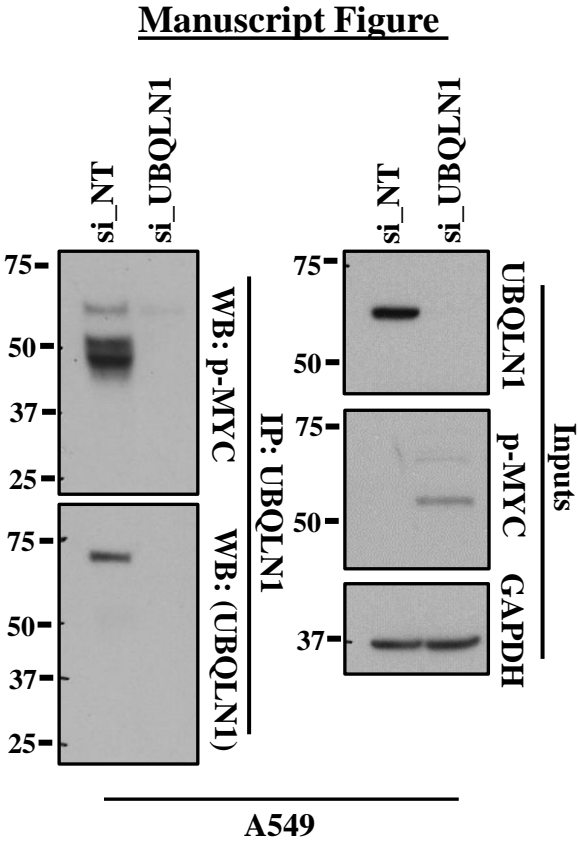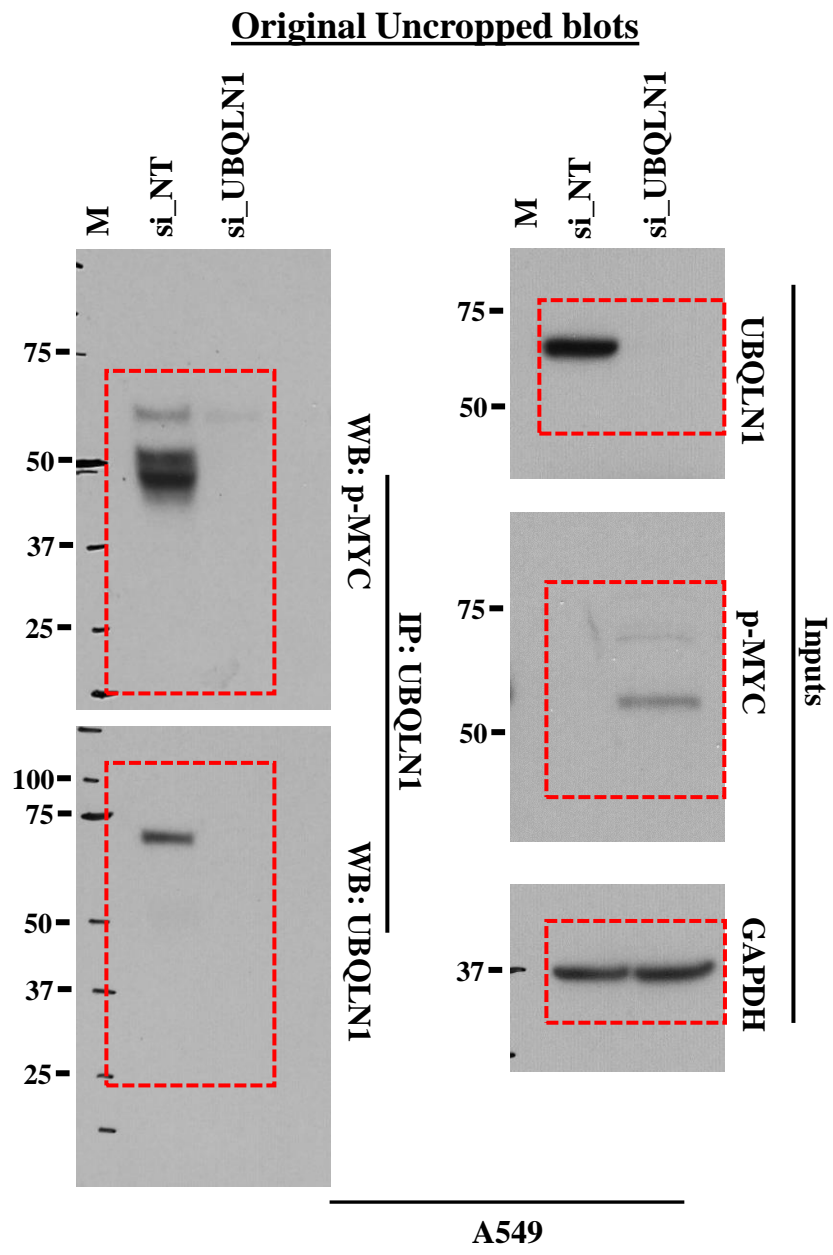

Note: M is Molecular weight marker

Figure S5

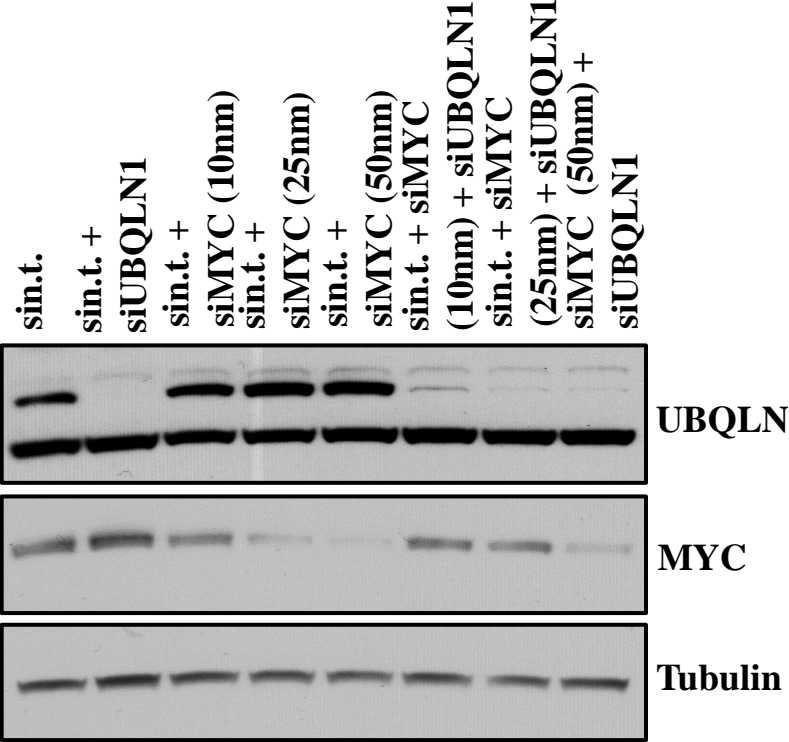

Manuscript Figure

Original Uncropped blots

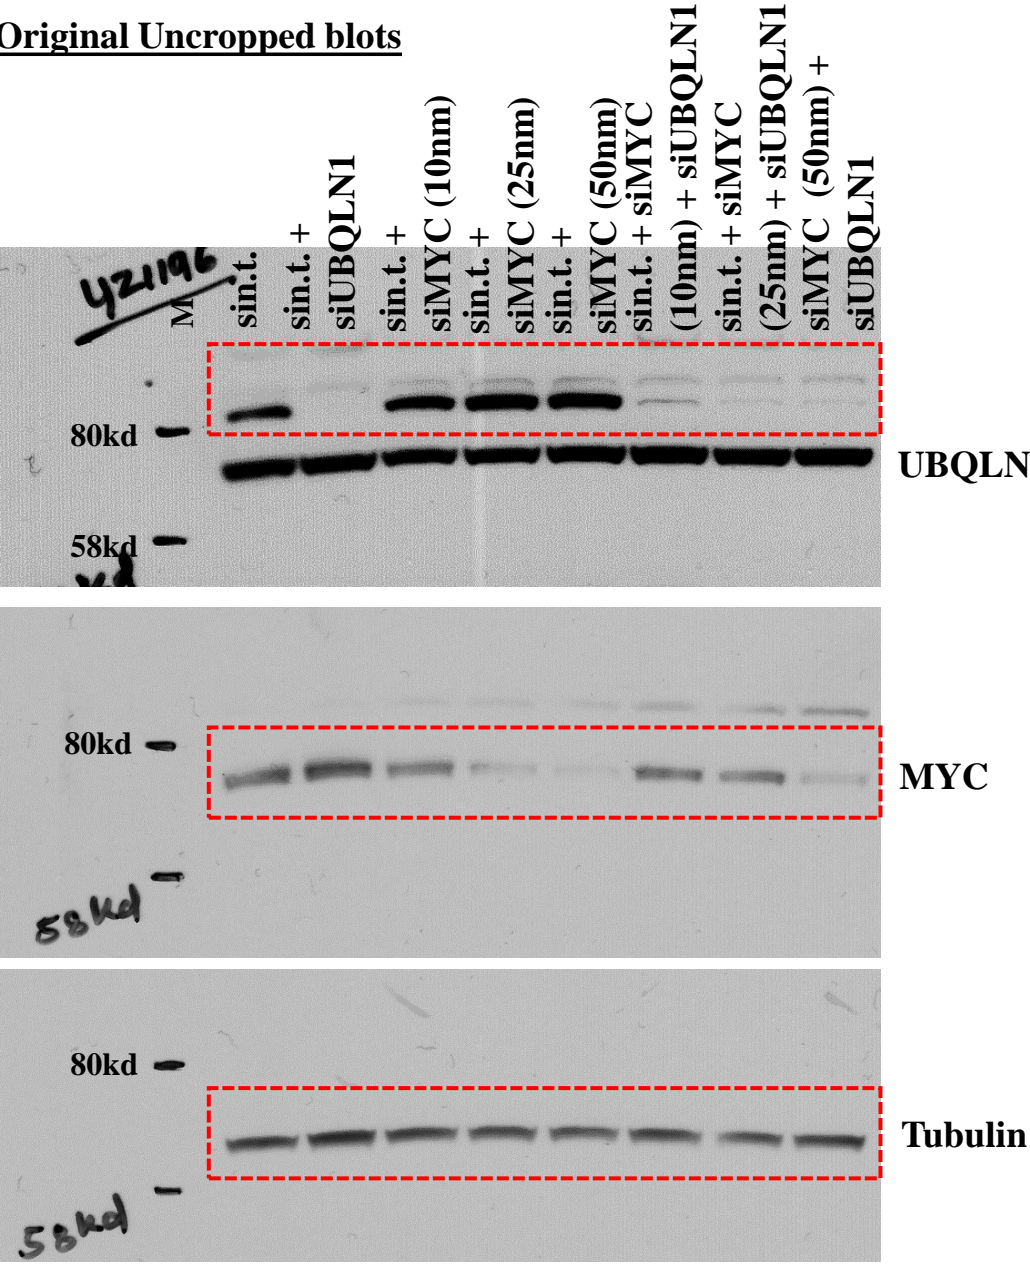

Note: M is Molecular weight marker

Figure S6A

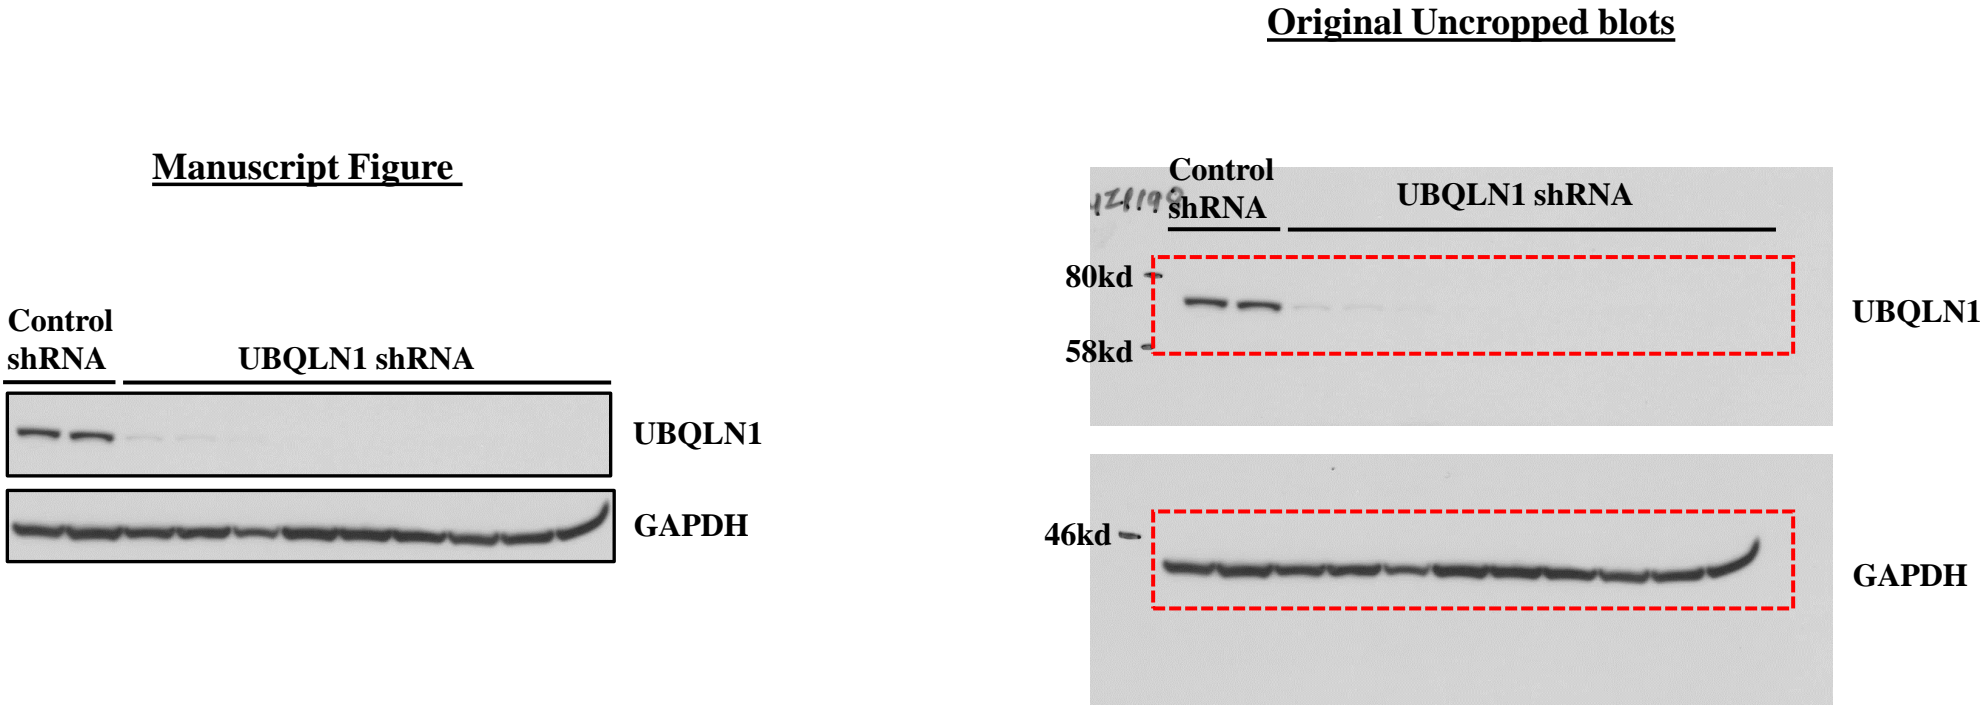

Note: M is Molecular weight marker



Figure S6B

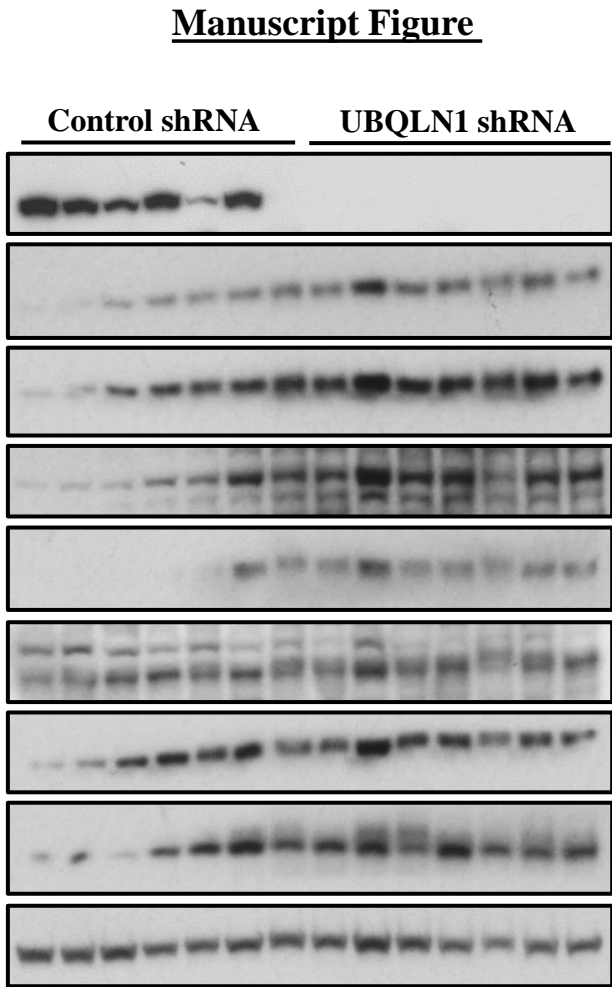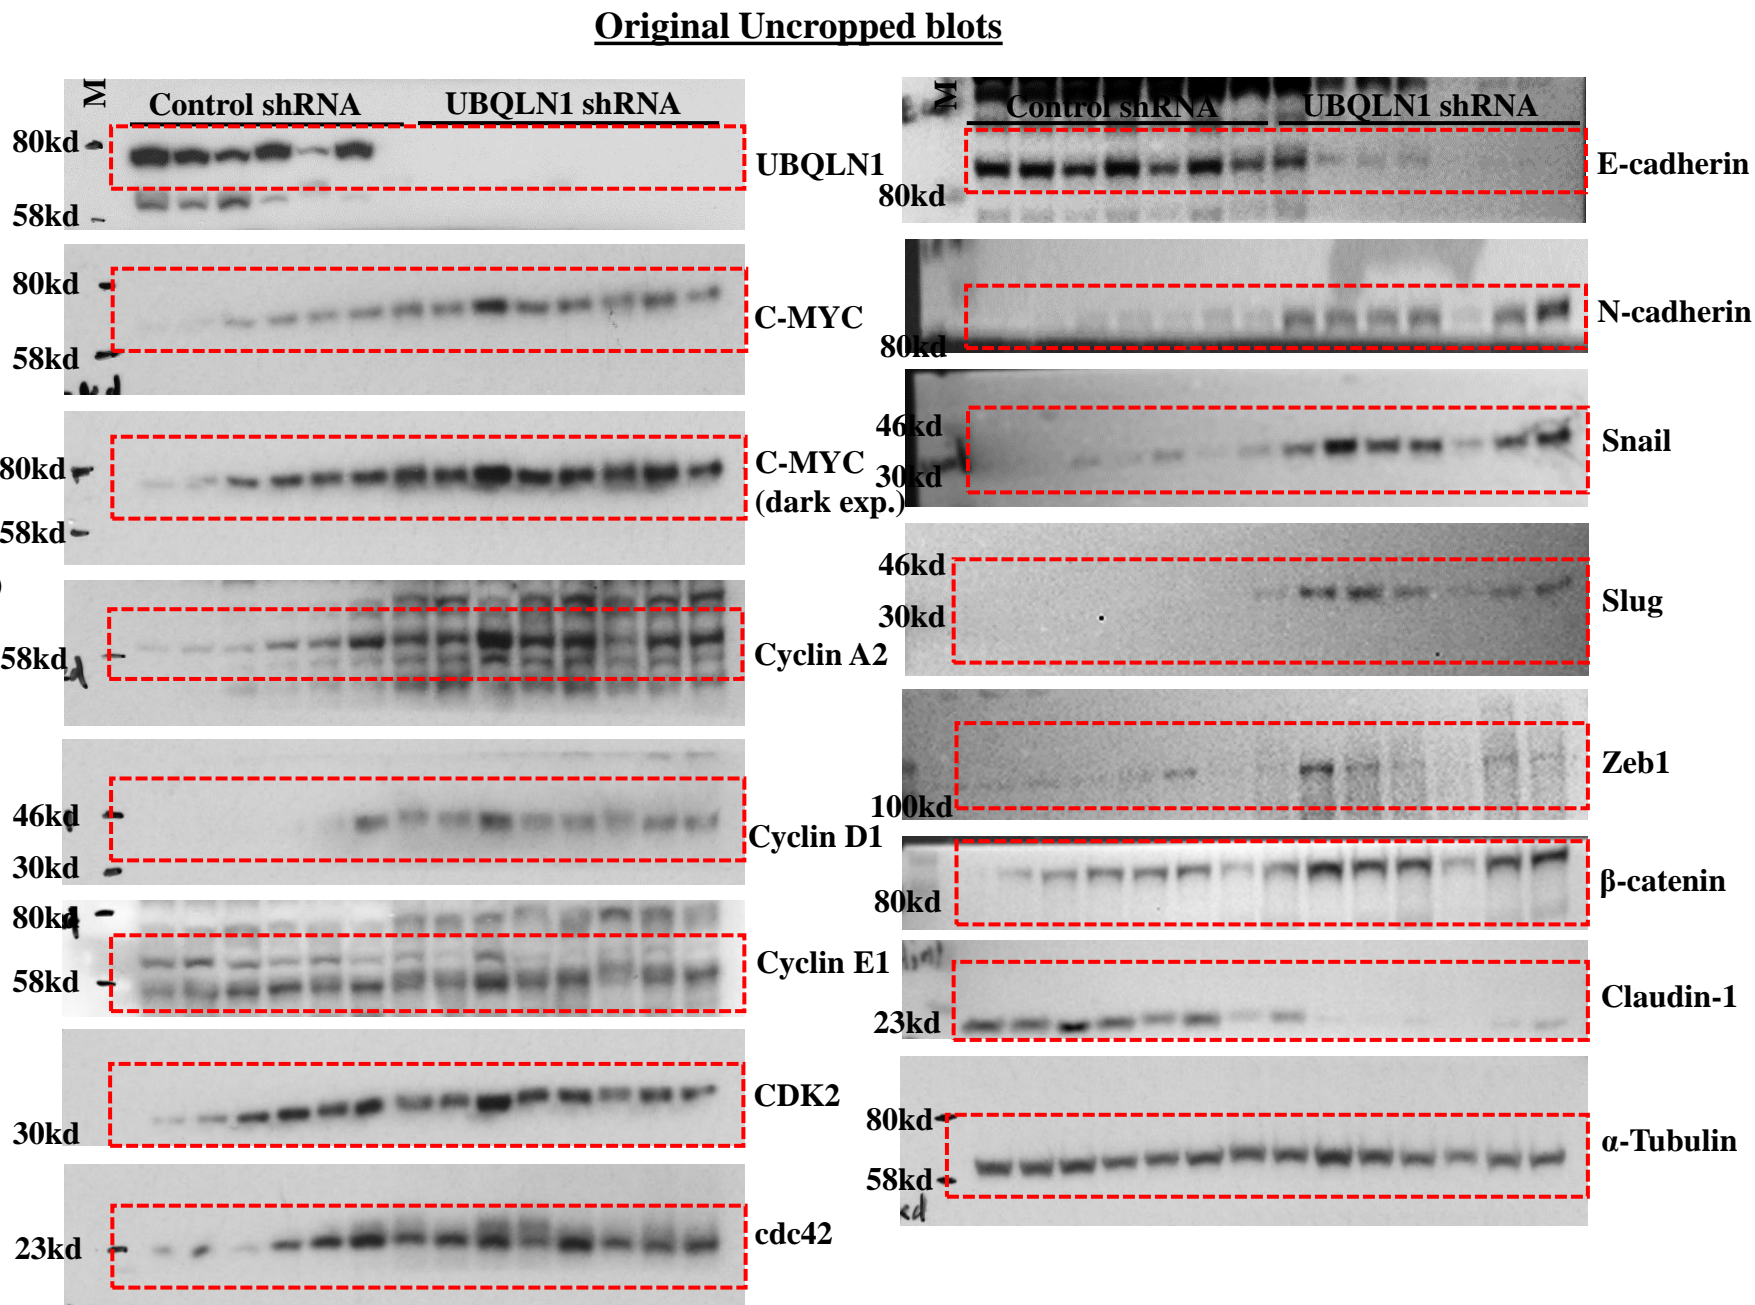

**Note:** M is Molecular weight marker

Supplementary Figure S7

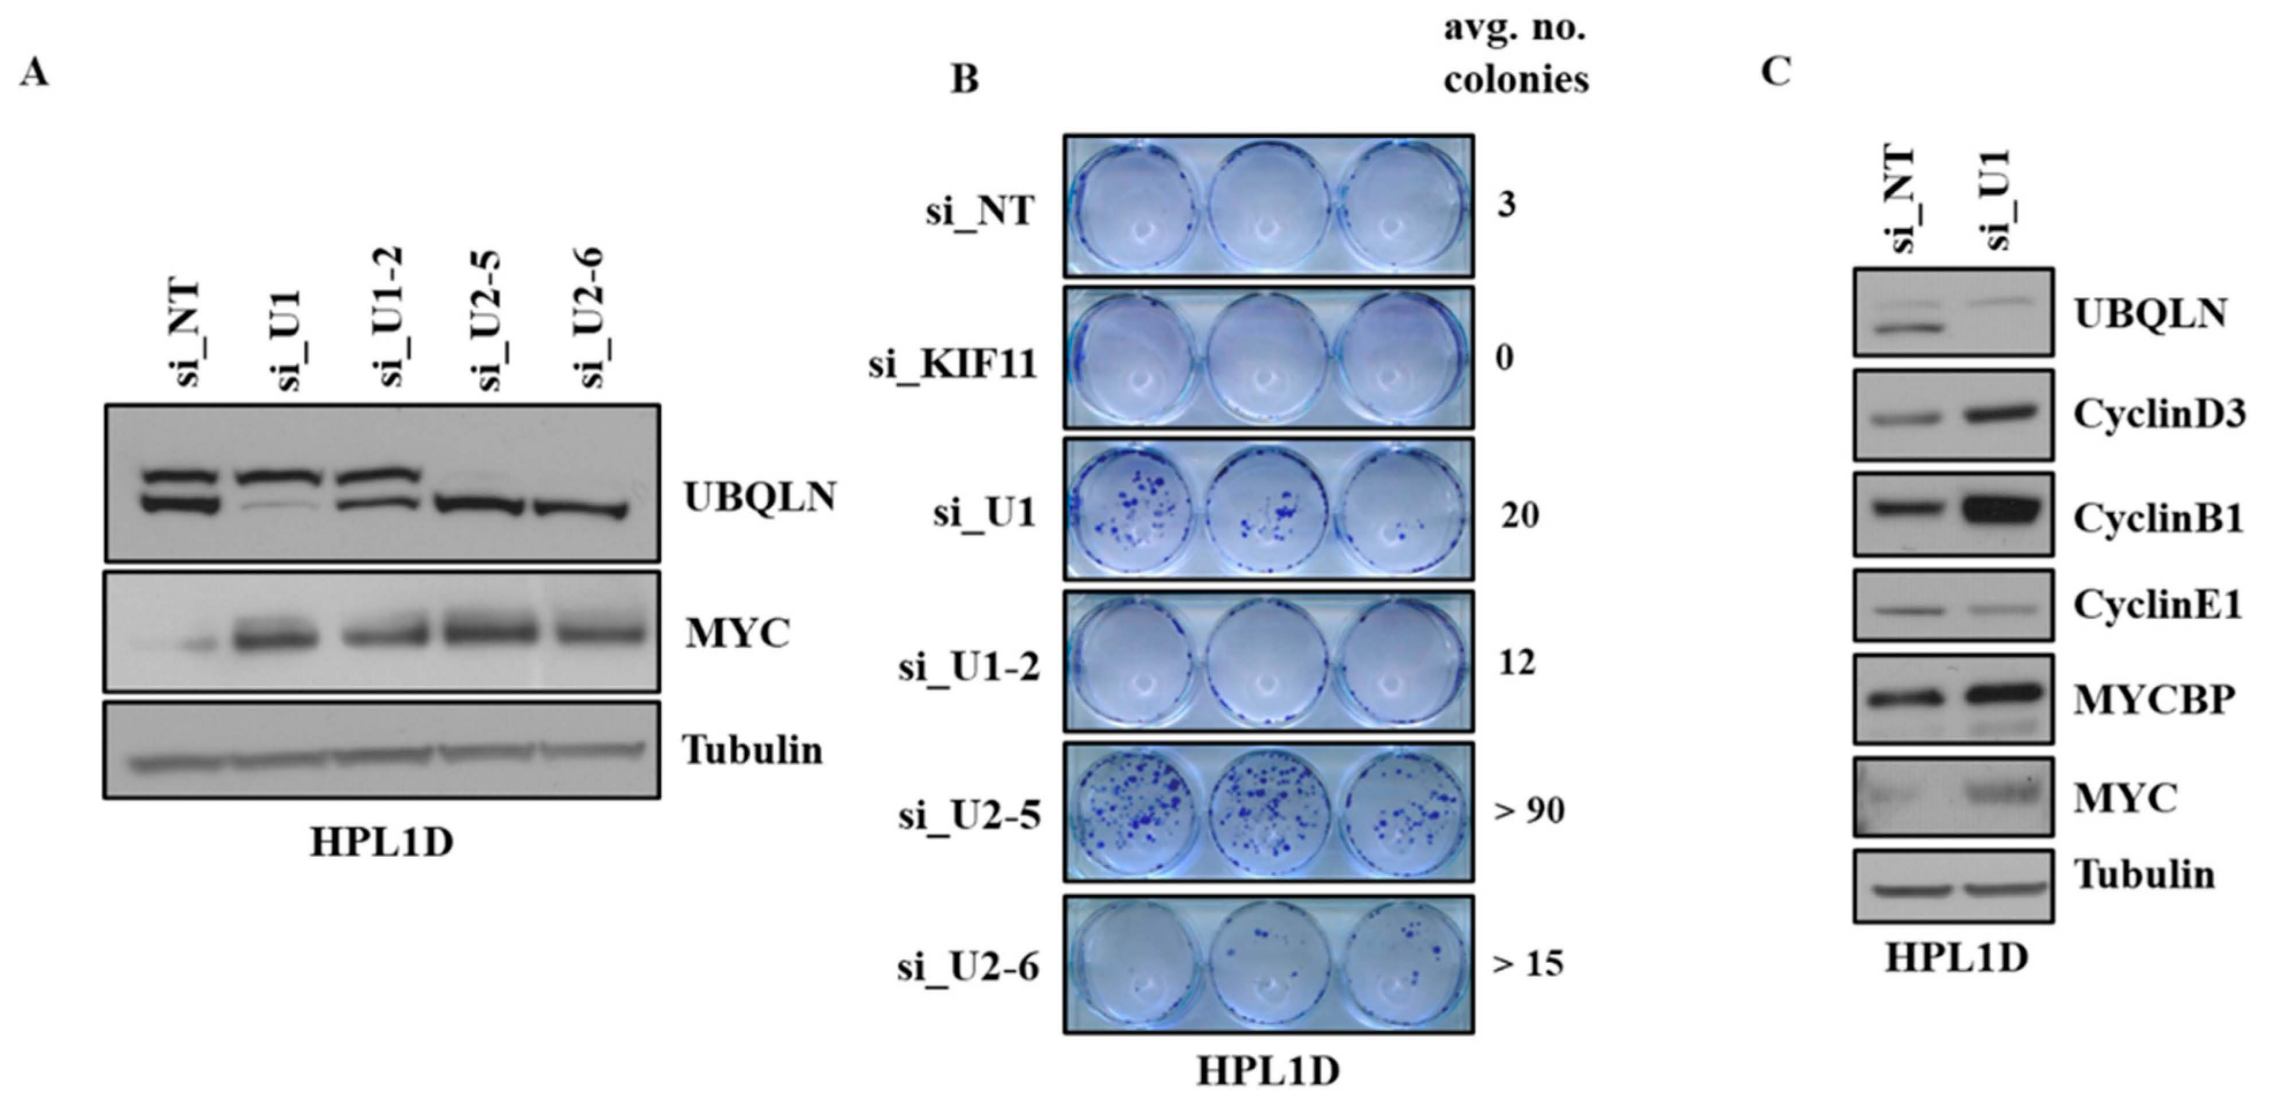

Supplementary Figure S8

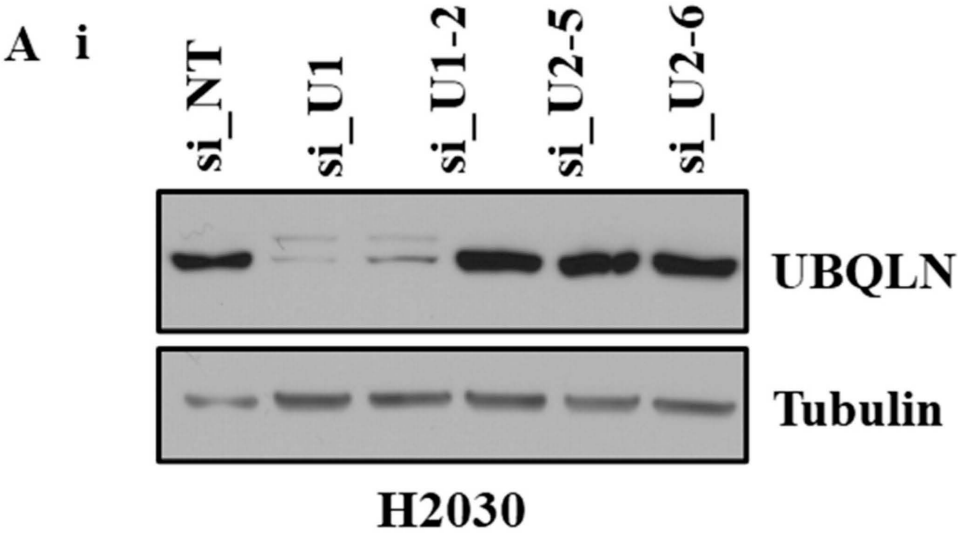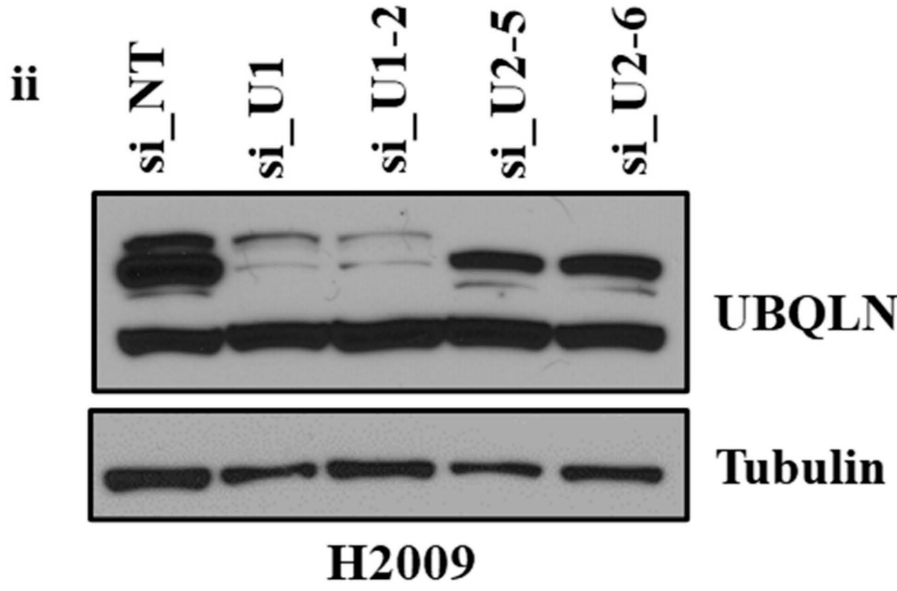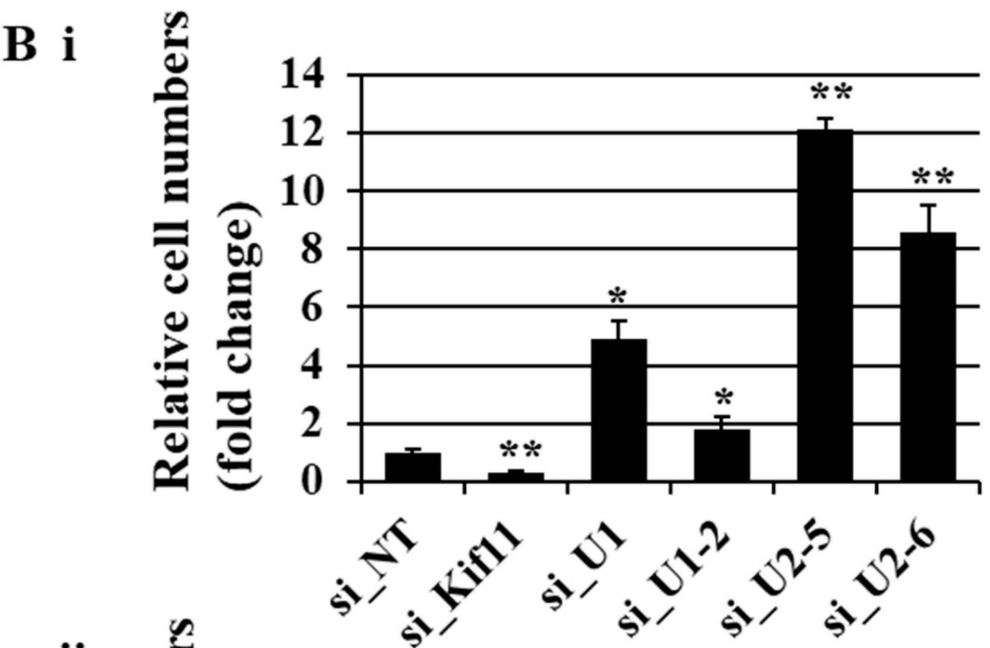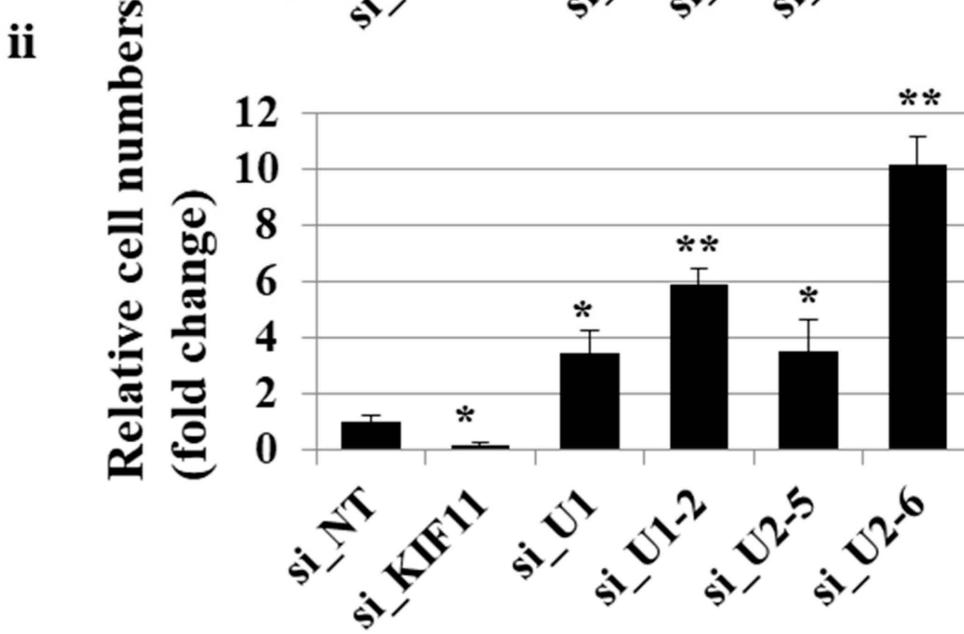

Supplement: s1 [file s1]
